# Supplementary material
Source: PubMed Central journal article supplement (PMC1888674)
Supplement: 7601712s4.pdf [file 7601712s4.pdf]

**Supplementary Table 3 Primer pairs used to amplify transcripts found in microarray analyses to be upregulated or downregulated in human cells after Stau1 depletion**

| Gene      | Primer (Sense)                                   | Primer (Antisense)                               |
|-----------|--------------------------------------------------|--------------------------------------------------|
| c-JUN     | <a href="#">5'-CTT GAA AGC TCA GAA CTC GG-3'</a> | <a href="#">5'-TCA GCC CCC GAC GGT CTC TC-3'</a> |
| SERPINE1  | <a href="#">5'-ACC GCC AAT CGC AAG GCA CC-3'</a> | <a href="#">5'-GCT GAT CTC ATC CTT GTT CC-3'</a> |
| IL7R      | <a href="#">5'-AAG TGG CTA TGC TCA AAA TG-3'</a> | <a href="#">5'-TTC AGG CAC TTT ACC TCC AC-3'</a> |
| IF        | <a href="#">5'-CCT TGA CCT TGG GTT TCA AC-3'</a> | <a href="#">5'-ATT TGC AAT GGA AGC CTT TG-3'</a> |
| GAP43     | <a href="#">5'-TGT GCT GTA TGA GAA GAA CC-3'</a> | <a href="#">5'-GCT TCA TCC TTC TTA TTA GC-3'</a> |
| CKMT1     | <a href="#">5'-GAC TGG CCA GAT GCT CGT GG-3'</a> | <a href="#">5'-ATC TTT GGG AAG CGG CTA TC-3'</a> |
| STMN3     | <a href="#">5'-CCA TGG CCA GCA CCA TTT CC-3'</a> | <a href="#">5'-ACC TCG GCC GCG TGC AGC TC-3'</a> |
| TAGLN     | <a href="#">5'-TCC TTC CTG CGA GCC CTG AG-3'</a> | <a href="#">5'-GCA CTG CTG CCA TGT CTT TG-3'</a> |
| OASL      | <a href="#">5'-TGC AAT CAT TGA GGA TTG TG-3'</a> | <a href="#">5'-CAC TGT CAA GTG GAT GTC TC-3'</a> |
| GDI1      | <a href="#">5'-GAC AGA GAC GTG AAG CAC TG-3'</a> | <a href="#">5'-CCA TAA ATG TTG CTT TAT CC-3'</a> |
| CXCL1     | <a href="#">5'-CCT GGT AGC CGC TGG CCG GC-3'</a> | <a href="#">5'-CTT CTG GTC AGT TGG ATT TG-3'</a> |
| DCP2      | <a href="#">5'-GAT TTA TGT TGT TGT AGT TG-3'</a> | <a href="#">5'-CCA AGC AGC CAA TTT TAT TG-3'</a> |
| TMSL8     | <a href="#">5'-ACA GCC TTT CAC GAG TCT TC-3'</a> | <a href="#">5'-CTG CTG TTG GGA GGC GAT CC-3'</a> |
| PSMB9     | <a href="#">5'-GCG GGA GAA GTC CAC ACC GG-3'</a> | <a href="#">5'-AGG CTG TCG AGT CAG CAT TC-3'</a> |
| GDAP1     | <a href="#">5'-AGT TAA CTG TGG ACT CCA TG-3'</a> | <a href="#">5'-ACT TTC TCC AAC TCA TCA AG-3'</a> |
| STC2      | <a href="#">5'-CCT GTC CCT GCA GAA TAC AG-3'</a> | <a href="#">5'-GTT CAC GAG GTC CAC GTA GG-3'</a> |
| DUSP      | <a href="#">5'-GCA AGT CTT CTT CCT CAA AG-3'</a> | <a href="#">5'-TTC CTC CAG CAT TCT TGA TG-3'</a> |
| GABARAPL1 | <a href="#">5'-AAA TAT CCG GAC AGG GTC CC-3'</a> | <a href="#">5'-TAG TCT TCC TCA TGA TTG TC-3'</a> |
| TXNIP     | <a href="#">5'-TCT GGA AGA CCA GCC AAC AG-3'</a> | <a href="#">5'-TCA GCA TGG ATG GAA ATC TC-3'</a> |
| TNFRSF10B | <a href="#">5'-TCG CCG CGG TCC TGC TGT TG-3'</a> | <a href="#">5'-TGA CCA TCC CTC TGG GAC AC-3'</a> |
| CCPG1     | <a href="#">5'-GGT CTG GAC TGA TGA AAA TC-3'</a> | <a href="#">5'-CAC TGT GCC ATT TTG GCT GC-3'</a> |
