# Supplementary material
Source: PubMed Central journal article supplement (PMC1888674)
Supplement: 7601712s5.pdf [file 7601712s5.pdf]

**Supplementary Table 4 Selected examples of transcripts upregulated in human cells depleted of Stau1 in three independently performed microarray analyses**

---

**Cell motility, cell adhesion, extracellular matrix**

actin alpha 2 smooth muscle aorta  
 chromosome 14 open reading frame 141  
 fibronectin 1  
 filamin-binding LIM protein-1  
 insulin-like growth factor binding protein 5  
 integrin alpha 4 (antigen CD49D alpha 4 subunit of VLA-4 receptor)  
 integrin beta 3 (platelet glycoprotein IIIa antigen CD61)  
 osteoblast specific factor 2 (fasciclin I-like)  
 protein tyrosine phosphatase receptor type F  
 tenascin C (hexabrachion)  
 thrombospondin 1  
 transforming growth factor beta 1 induced transcript 1

**Structural molecule activity, cytoskeleton, cytoskeleton organization and biogenesis**

actin alpha 2 smooth muscle aorta  
 actinin alpha 1  
 chemokine (C-X-C motif) ligand 1 (melanoma growth stimulating activity alpha)  
 filamin-binding LIM protein-1  
 Rho GDP dissociation inhibitor (GDI) beta  
 thymosin beta identified in neuroblastoma cells  
 tissue factor pathway inhibitor 2

**Regulation of cell growth, cell cycle**

chemokine (C-X-C motif) ligand 1 (melanoma growth stimulating activity alpha)  
 chromosome 14 open reading frame 141  
 cyclin-dependent kinase 5 regulatory subunit 1 (p35)  
 cyclin-E binding protein 1  
 dual specificity phosphatase 6  
 ets variant gene 1  
 growth associated protein 43  
 histone deacetylase 8  
 signaling lymphocytic activation molecule family member 1  
 spinal cord-derived growth factor-B  
 suppressor of cytokine signaling 2  
 tumor protein p53 (Li-Fraumeni syndrome)  
 v-jun sarcoma virus 17 oncogene homolog (avian)

**Apoptosis**

catenin (cadherin-associated protein) alpha-like 1  
 TIA1 cytotoxic granule-associated RNA binding protein  
 tumor protein p53 (Li-Fraumeni syndrome)

**Immune response**

2'-5'-oligoadenylate synthetase-like  
 chemokine (C-X-C motif) ligand 1 (melanoma growth stimulating activity alpha)  
 fibronectin 1  
 guanylate binding protein 1 interferon-inducible 67kDa

---

**Supplementary Table 4, Cont'd**


---

interferon alpha-inducible protein (clone IFI-15K)  
interferon-induced protein with tetratricopeptide repeats 1  
interferon-induced protein with tetratricopeptide repeats 2  
interferon-induced protein with tetratricopeptide repeats 4  
interleukin 7 receptor  
prostaglandin E receptor 4 (subtype EP4)  
proteasome (prosome macropain) subunit beta type 9 (large multifunctional protease 2)  
Rho GDP dissociation inhibitor (GDI) beta  
signaling lymphocytic activation molecule family member 1

**Response to stress (extracellular stimuli)**

chemokine (C-X-C motif) ligand 1 (melanoma growth stimulating activity alpha)  
fibronectin 1  
growth associated protein 43  
integrin beta 3 (platelet glycoprotein IIIa antigen CD61)  
interferon-induced protein 44  
interleukin 7 receptor  
signaling lymphocytic activation molecule family member 1  
tissue factor pathway inhibitor 2

**Regulation of DNA recombination, DNA repair**

interleukin 7 receptor  
tumor protein p53 (Li-Fraumeni syndrome)  
uracil-DNA glycosylase

**Regulation of transcription**

ets variant gene 1  
hairy and enhancer of split 1 (*Drosophila*)  
high-mobility group box 3  
leucine rich repeat (in FLII) interacting protein 1  
PHD finger protein 11  
transducin-like enhancer of split 4 (E(sp1) homolog *Drosophila*)  
transforming growth factor beta 1 induced transcript 1  
tumor protein p53 (Li-Fraumeni syndrome)  
v-jun sarcoma virus 17 oncogene homolog (avian)  
zinc finger protein 90 homolog (mouse)

**Regulation of translation**

eukaryotic translation initiation factor 5A2

**Protein secretion**

secretogranin II (chromogranin C)

**Signal cascade**

2'-5'-oligoadenylate synthetase-like  
chemokine (C-X-C motif) ligand 1 (melanoma growth stimulating activity alpha)  
chromosome 14 open reading frame 141  
dihydropyrimidinase-like 3  
dual specificity phosphatase 6

---

**Supplementary Table 4, Cont'd**


---

growth associated protein 43  
 guanine nucleotide binding protein (G protein) gamma 4  
 hypothetical protein FLJ33505  
 insulin-like growth factor binding protein 5  
 integrin alpha 4 (antigen CD49D alpha 4 subunit of VLA-4 receptor)  
 integrin beta 3 (platelet glycoprotein IIIa antigen CD61)  
 interleukin 7 receptor  
 prostaglandin E receptor 4 (subtype EP4)  
 protein tyrosine phosphatase receptor type F  
 protein tyrosine phosphatase receptor type O  
 Rho GDP dissociation inhibitor (GDI) beta  
 signaling lymphocytic activation molecule family member 1  
 spinal cord-derived growth factor-B  
 stathmin-like 3  
 suppressor of cytokine signaling 2  
 tenascin C (hexabrachion)  
 thrombospondin 1  
 transducin-like enhancer of split 4 (E(sp1) homolog *Drosophila*)  
 transforming growth factor beta 1 induced transcript 1  
 type I transmembrane receptor (seizure-related protein)

**Complement and coagulation cascades**

I factor (complement)  
 serine (or cysteine) proteinase inhibitor clade E  
 thrombospondin 1  
 tissue factor pathway inhibitor 2

**Cellular metabolism**

aldehyde dehydrogenase 1 family member A3  
 CGI-72 protein  
 cyclin-E binding protein 1  
 dihydropyrimidinase-like 3  
 enoyl-Coenzyme A hydratase/3-hydroxyacyl Coenzyme A dehydrogenase  
 hypothetical protein FLJ25348  
 protein tyrosine phosphatase receptor type O  
 selenocysteine lyase  
 uracil-DNA glycosylase

**Development, morphogenesis, organogenesis**

actin alpha 2 smooth muscle aorta  
 chemokine (C-X-C motif) ligand 1 (melanoma growth stimulating activity alpha)  
 cyclin-dependent kinase 5 regulatory subunit 1 (p35)  
 dihydropyrimidinase-like 3  
 filamin-binding LIM protein-1  
 growth associated protein 43  
 hairy and enhancer of split 1 (*Drosophila*)  
 high-mobility group box 3  
 osteoblast specific factor 2 (fasciclin I-like)  
 Rho GDP dissociation inhibitor (GDI) beta  
 stathmin-like 3  
 suppressor of cytokine signaling 2  
 thrombospondin 1

---

**Supplementary Table 4, Cont'd**

---

transducin-like enhancer of split 4 (E(sp1) homolog *Drosophila*)  
transgelin  
tumor protein p53 (Li-Fraumeni syndrome)

**Organelle organization and biogenesis**

thymosin beta identified in neuroblastoma cells

**Oxidoreductase activity**

fibronectin 1

**Proteasome, ubiquitin cycle**

cyclin-E binding protein 1  
hypothetical protein FLJ20637  
proteasome (prosome macropain) subunit beta type 9 (large multifunctional protease 2)

---
