# Supplementary material
Source: PubMed Central journal article supplement (PMC1888674)
Supplement: 7601712s6.pdf [file 7601712s6.pdf]

**Supplementary Table 5 Transcripts upregulated in human cells depleted of either Stau1 (three independently performed microarray analyses in this study) or Upf1 (Mendell *et al*, 2004)**

| Transcript                                                                                                           | Product function                                                | Relative increase<br>(microarray value) |                   |
|----------------------------------------------------------------------------------------------------------------------|-----------------------------------------------------------------|-----------------------------------------|-------------------|
|                                                                                                                      |                                                                 | Stau1<br>depletion                      | Upf1<br>depletion |
| Serine (or cysteine) proteinase inhibitor clade E (nexin plasminogen activator inhibitor type 1) member 1 (SERPINE1) | Bait for tissue plasminogen activator, urokinase, and protein C | 3.2                                     | 3.8               |
| Interleukin 7 receptor (IL7R)                                                                                        | Receptor for interleukin 7                                      | 3.0                                     | 2.1               |
| v-jun sarcoma virus 17 oncogene homolog (avian) (c-JUN)                                                              | Proto oncogene                                                  | 2.6                                     | 5.3               |
| Protein tyrosine phosphatase receptor type F (PTPRF)                                                                 | Cell adhesion receptor                                          | 2.0                                     | 2.8               |
