# Supplementary material
Source: PubMed Central journal article supplement (PMC1888674)
Supplement: 7601712s7.pdf [file 7601712s7.pdf]

**Supplementary Table 6 Transcripts upregulated in human cells depleted of Stau1 in three independently performed microarray analyses and that bind Stau1-HA<sub>3</sub> in three (white) or two (gray) independently performed microarray analyses**

| Transcript                                                                                                                                        | Relative increase<br>(microarray value) |            | Accession |
|---------------------------------------------------------------------------------------------------------------------------------------------------|-----------------------------------------|------------|-----------|
|                                                                                                                                                   | Stau1 depletion                         | Anti-HA IP |           |
| <i>Homo sapiens</i> cDNA FLJ40697 fis clone THYMU2025406                                                                                          | 2.5                                     | 16.6       | AA398756  |
| <i>Homo sapiens</i> transcribed sequence with moderate similarity to protein ref:NP_071431.1 ( <i>H.sapiens</i> ) cytokine receptor-like factor 2 | 2.3                                     | 9.2        | AA824321  |
| Interferon-induced protein with tetratricopeptide repeats 4 (IFIT4)                                                                               | 4.1                                     | 7.2        | AI075407  |
| Stathmin-like 3 (STMN3)                                                                                                                           | 5.5                                     | 6.4        | AL353715  |
| Interferon alpha-inducible protein (clone IFI-15K) (G1P2)                                                                                         | 3.2                                     | 4.1        | NM_005101 |
| Cyclin-dependent kinase 5 regulatory subunit 1 (p35) (CDK5R1)                                                                                     | 2.1                                     | 3.8        | AL567411  |
| Decapping enzyme hDcp2 (DCP2)                                                                                                                     | 2.7                                     | 2.6        | AV715578  |
| KIAA0143 protein (KIAA0143)                                                                                                                       | 2.0                                     | 2.4        | AW470003  |
| Cyclin-E binding protein 1 (CEB1)                                                                                                                 | 3.6                                     | 2.3        | NM_016323 |
| Rho GTPase activating protein 19 (ARHGAP19)                                                                                                       | 2.1                                     | 2.0        | U79256    |
| Guanine nucleotide binding protein (G protein) gamma 4 (GNG4)                                                                                     | 4.8                                     | 4.3        | NM_004485 |
| Rho GTPase activating protein 19 (ARHGAP19)                                                                                                       | 2.1                                     | 2.1        | AV717623  |
| <i>Homo sapiens</i> cDNA FLJ37290 fis clone BRAMY2014469.                                                                                         | 2.1                                     | 7.4        | AW451135  |
| Epiplakin 1 (EPPK1)                                                                                                                               | 2.3                                     | 3.9        | AL137725  |
| Fibronectin 1 (FN1)                                                                                                                               | 4.7                                     | 3.3        | X02761    |
| KIAA0931 protein (KIAA0931)                                                                                                                       | 2.1                                     | 3.0        | AB023148  |
| <i>Homo sapiens</i> similar to KIAA0563-related gene (LOC376854) mRNA                                                                             | 3.4                                     | 2.6        | BC040700  |
| Likely ortholog of mouse Sds3 (SDS3)                                                                                                              | 2.1                                     | 2.6        | AK026749  |
| Thioredoxin reductase 3 (TXNRD3)                                                                                                                  | 2.0                                     | 2.4        | AI247566  |
| KIAA0143 protein (KIAA0143)                                                                                                                       | 2.3                                     | 2.3        | AA805651  |
