# Supplementary material
Source: PubMed Central journal article supplement (PMC1888674)

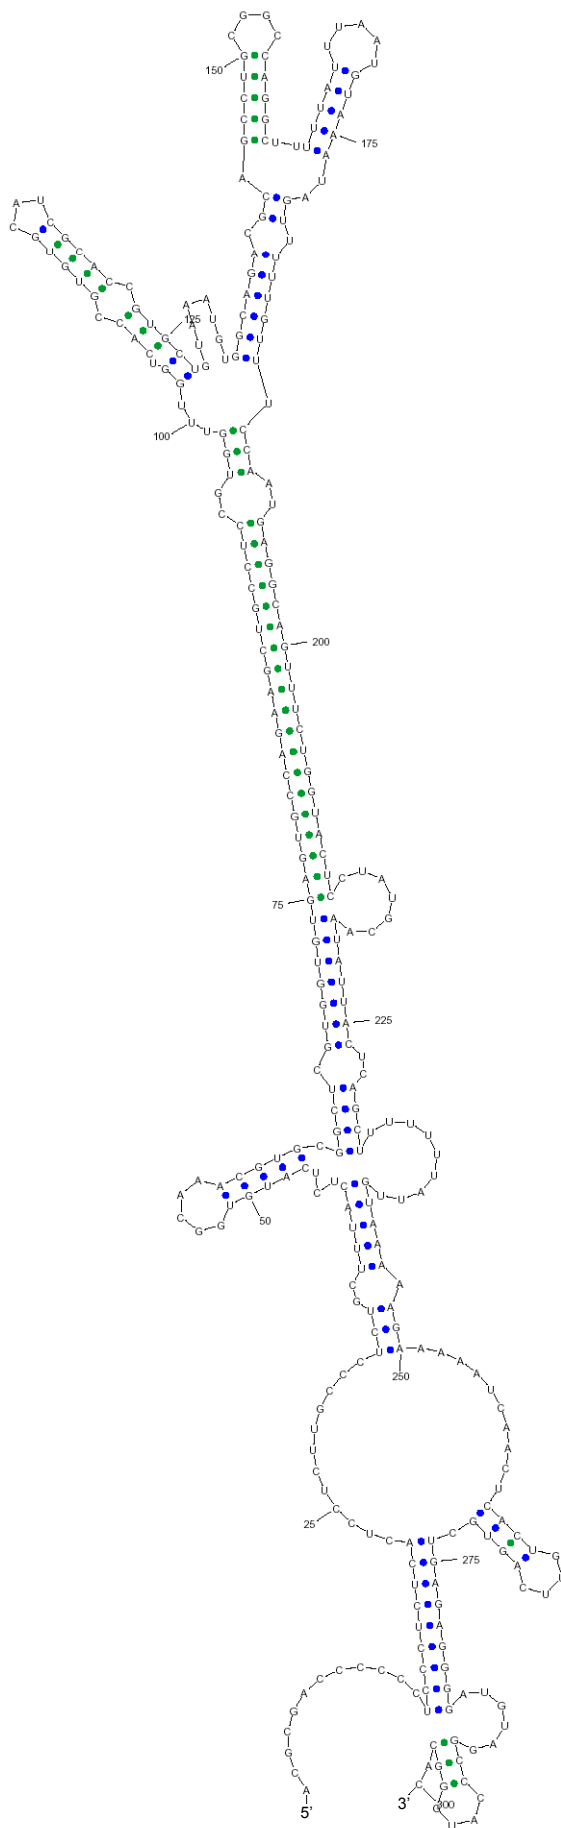

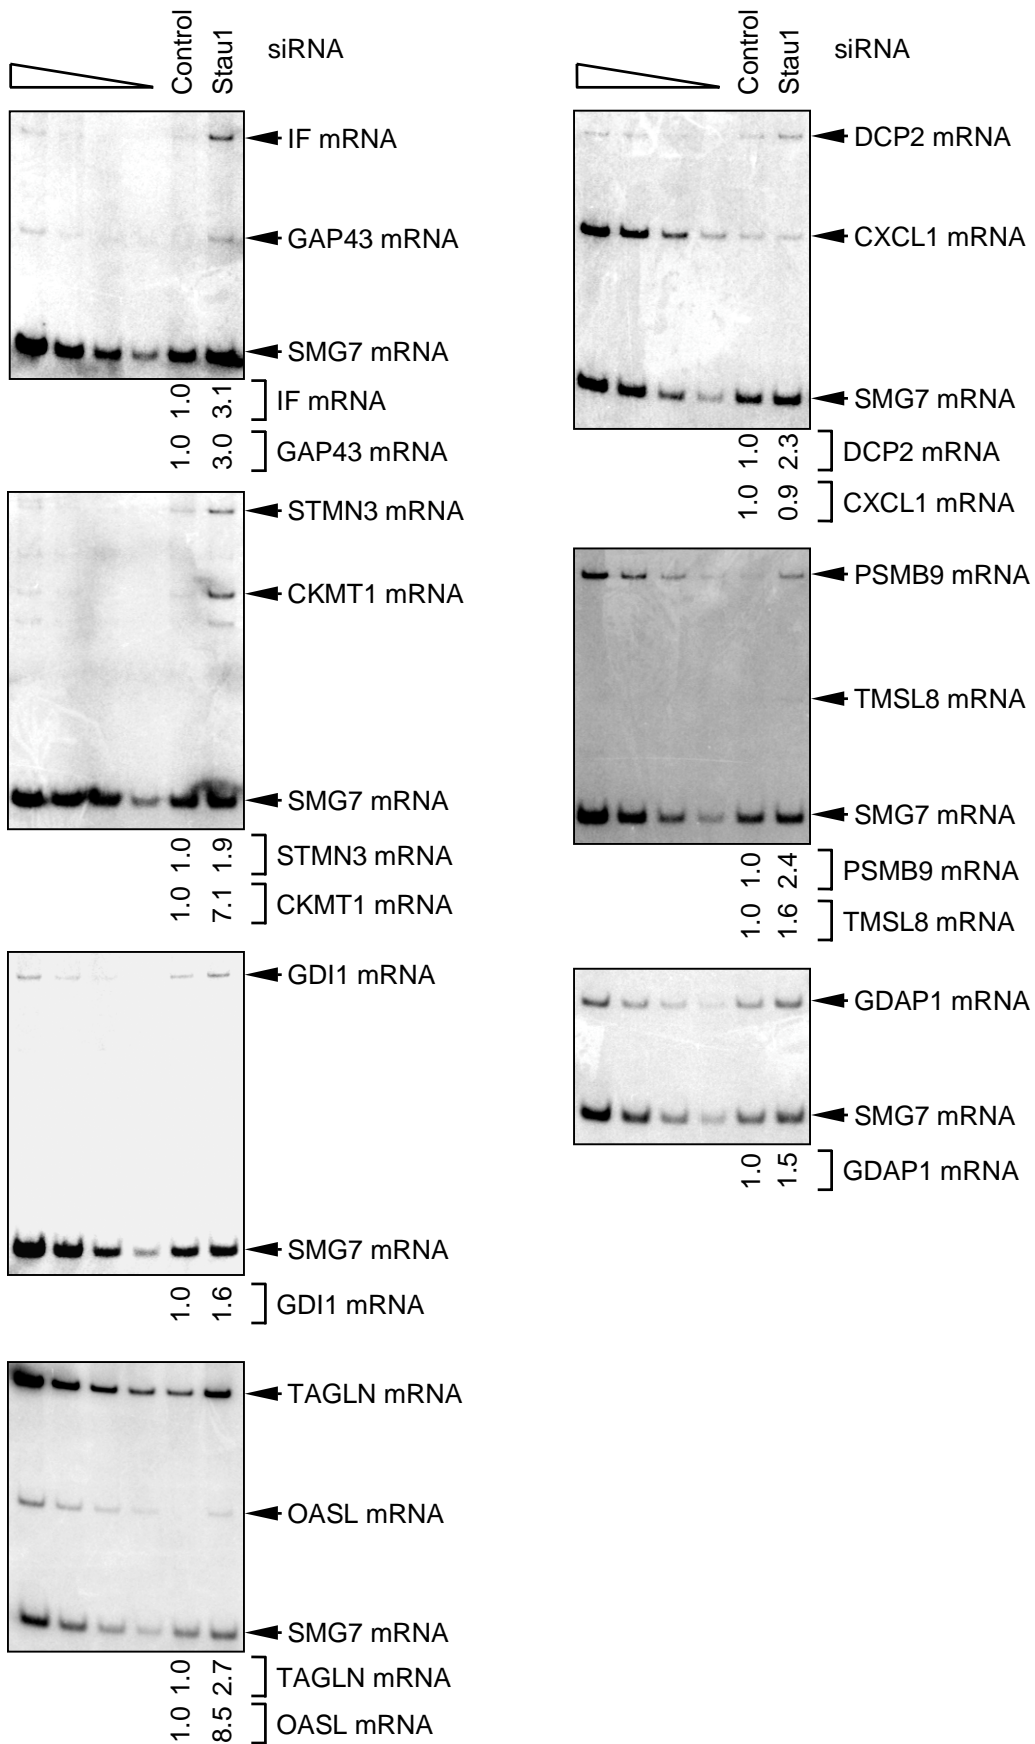

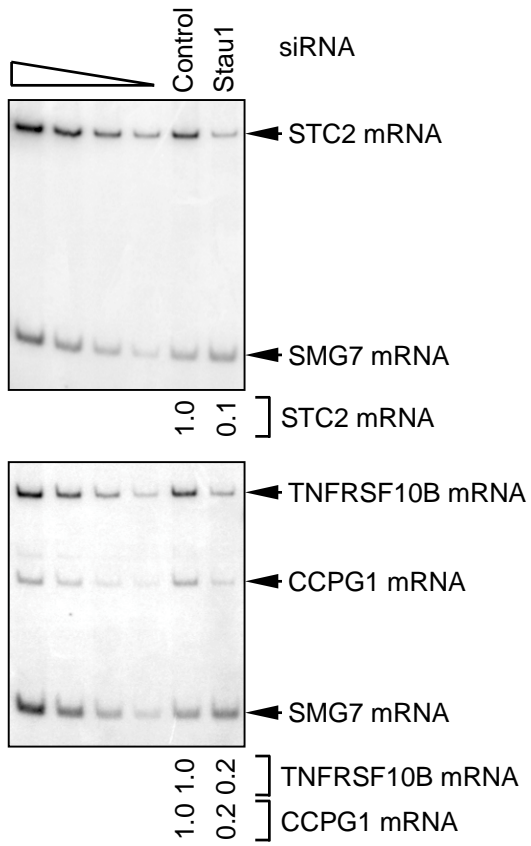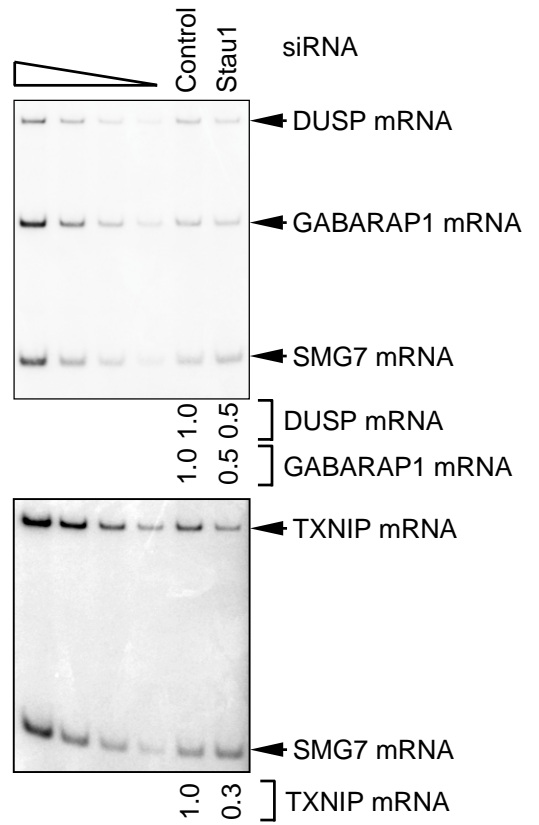

Supplement: 7601712s1.pdf [file 7601712s1.pdf]
